# Supplementary material for: Size-tunable silicon nanoparticles synthesized in solution via a redox reaction
Source: Royal Society of Chemistry journal article supplement (doi:10.1039/d3nr05793c), 2024-01-01
Supplement: d3nr05793c1.pdf [file d3nr05793c1.pdf]

Supporting information

## Size-tunable silicon nanoparticles synthesized in solution via a redox reaction

Megan A. Parker, Maria Letizia De Marco, Alexander Castro-Grijalba, Anissa Ghoridi, David Portehault, Stanislav Pechev, Elizabeth A. Hilar, Sabrina Lacomme, Aurélie Bessi re, Fr d rique Cunin, Patrick Rosa, Mathieu Gonidec, Glenna L. Drisko

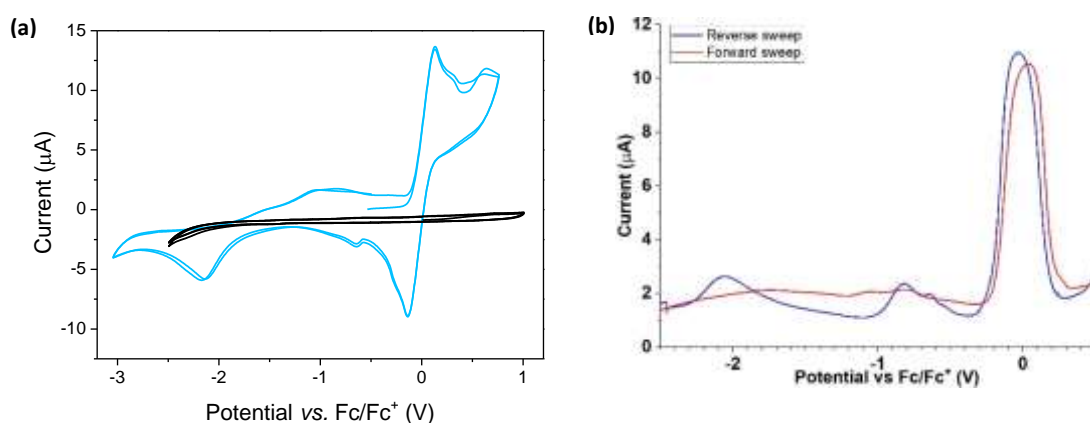

**Figure S1.** (a) Cyclic voltammogram (scan rate,  $100 \text{ mV s}^{-1}$ , potential corrected vs  $\text{Fc}/\text{Fc}^+$ ) of 5.0 mg silicon bisamidinate **2** and 8.2 mg of ferrocene (7.6 eq) in DMF/0.1 M TBAPF<sub>6</sub> solution vs ( $\text{Fc}/\text{Fc}^+$ ) using a platinum disk working electrode, shown in red, with the baseline shown in black. (b) Square wave voltammograms in reverse (blue curve) and forward (red curve) modes (scan rate  $50 \text{ mVs}^{-1}$ ). Integration of the irreversible peak seen for **2** gives a charge count close to 1/7 of the ferrocene peak, supporting a monoelectronic process

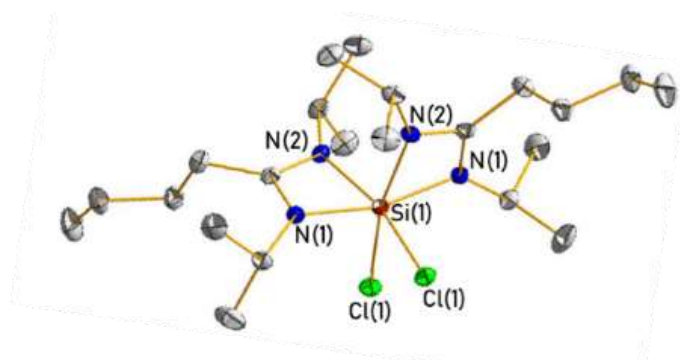

**Figure S2.** Molecular structure of **2** with anisotropic displacement ellipsoids drawn at the 50% probability level. Hydrogen atoms have been omitted for clarity.

**Table S1.** Single-crystal X-ray diffraction data collection and refinement information for compound **2**.

|                                                             |                                                                   |
|-------------------------------------------------------------|-------------------------------------------------------------------|
| Formula                                                     | C <sub>22</sub> H <sub>46</sub> Cl <sub>2</sub> N <sub>4</sub> Si |
| <i>D</i> <sub>calc.</sub> / g cm <sup>-3</sup>              | 1.139                                                             |
| <i>μ</i> /mm <sup>-1</sup>                                  | 0.298                                                             |
| Formula weight                                              | 465.62                                                            |
| Color                                                       | colorless                                                         |
| Shape                                                       | plate-shaped                                                      |
| Size/mm <sup>3</sup>                                        | 0.169 × 0.12 × 0.041                                              |
| <i>T</i> / K                                                | 120                                                               |
| Crystal System                                              | monoclinic                                                        |
| Space Group                                                 | <i>C2/c</i>                                                       |
| <i>a</i> /Å                                                 | 13.1108(12)                                                       |
| <i>b</i> /Å                                                 | 12.0581(11)                                                       |
| <i>c</i> /Å                                                 | 18.0846(16)                                                       |
| <i>α</i> /°                                                 | 90                                                                |
| <i>β</i> /°                                                 | 108.199(3)                                                        |
| <i>γ</i> /°                                                 | 90                                                                |
| <i>V</i> /Å <sup>3</sup>                                    | 2716.0(4)                                                         |
| <i>Z</i>                                                    | 4                                                                 |
| <i>Z'</i>                                                   | 0.5                                                               |
| Wavelength / Å                                              | 0.71073                                                           |
| Radiation type                                              | MoK <sub>α</sub>                                                  |
| 2 $\theta$ range for data collection/°                      | 4.702 to 56.564                                                   |
| Index ranges                                                | -17 ≤ <i>h</i> ≤ 17, -16 ≤ <i>k</i> ≤ 16, -24 ≤ <i>l</i> ≤ 24     |
| Measured Refl's.                                            | 13089                                                             |
| Indep't Refl's                                              | 3365                                                              |
| <i>R</i> <sub>int</sub>                                     | 0.0490                                                            |
| Refl's [ <i>I</i> ≥ 2 $\sigma$ ( <i>I</i> )]                | 2551                                                              |
| Data/restraints/parameters                                  | 3365/0/137                                                        |
| Goof                                                        | 1.034                                                             |
| wR <sub>2</sub> (all data)                                  | 0.0810                                                            |
| wR <sub>2</sub> [ <i>I</i> ≥ 2 $\sigma$ ( <i>I</i> )]       | 0.0734                                                            |
| <i>R</i> <sub>1</sub> (all data)                            | 0.0550                                                            |
| <i>R</i> <sub>1</sub> [ <i>I</i> ≥ 2 $\sigma$ ( <i>I</i> )] | 0.0330                                                            |
| Largest Peak / e Å <sup>-3</sup>                            | 0.311                                                             |
| Deepest Hole / e Å <sup>-3</sup>                            | -0.223                                                            |

**Table S2.** Distortion parameters calculated with the OCTADIST software<sup>1</sup> for compound **2**.

|                              |          |
|------------------------------|----------|
| <i>d</i> <sub>mean</sub> (Å) | 1.9853   |
| $\zeta$ (Å)                  | 0.896439 |
| $\Delta$                     | 0.006508 |
| $\Sigma$ (°)                 | 87.3007  |
| $\Theta$ (°)                 | 282.0027 |

$\zeta$  and  $\Delta$  are radial distortion parameters:  $\zeta = \sum_{i=1}^6 |d_i - d_{mean}|$  and  $\Delta = \frac{1}{6} \sum_{i=1}^6 \left( \frac{d_i - d_{mean}}{d_{mean}} \right)^2$ , where *d*<sub>*i*</sub> are the individual Si-ligand bond lengths and *d*<sub>mean</sub> their average.

$\Sigma$  is an angular distortion parameter:  $\Sigma = \sum_{i=1}^{12} |90 - \varphi_i|$ , where  $\varphi_i$  are the 12 ligand-Si-ligand angles.

$\Theta$  is a torsional distortion parameter:  $\Theta = \sum_{i=1}^{24} |60 - \theta_i|$ , where  $\theta_i$  are the 25 angles between two vectors of opposed twisting faces.

**Table S3.** Continuous Shape Measure calculated with the online CoSyM tool<sup>2</sup> for compound **2**. The C<sub>2</sub> symmetry point group and octahedral shape were chosen for the calculations. Note that for both measures, values range from 0 (perfect agreement with symmetry or shape) to 100.

|                         |          |
|-------------------------|----------|
| C <sub>2</sub> Symmetry | 9.99E-13 |
| Octahedron              | 2.908108 |
| Chirality               | 1.647677 |

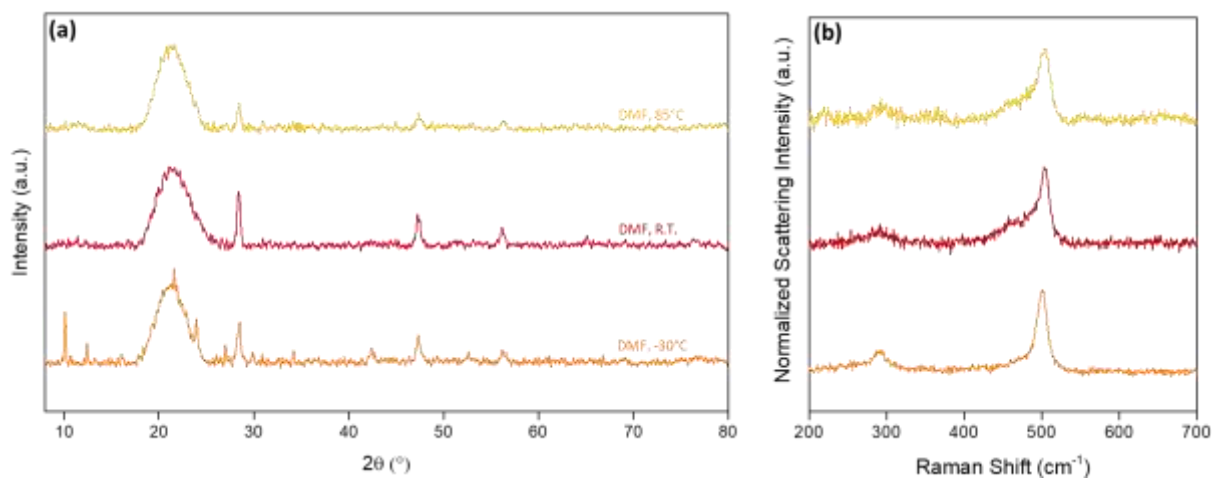

**Figure S3.** (a) Powder X-Ray diffractograms and (b) Raman spectra of reaction products from silicon bisamidinate **2** + Na<sub>4</sub>Si<sub>4</sub> stirred in DMF for 16 h at (orange) -30 °C, (red) 25 °C, and (yellow) 85 °C.

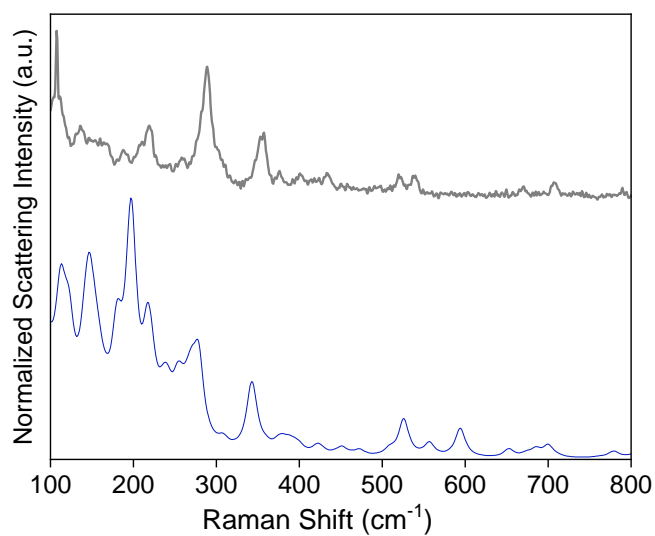

**Figure S4.** Superposition of (grey) the experimental and (blue) the DFT computed Raman spectra of silicon bisamidinate, **2**.

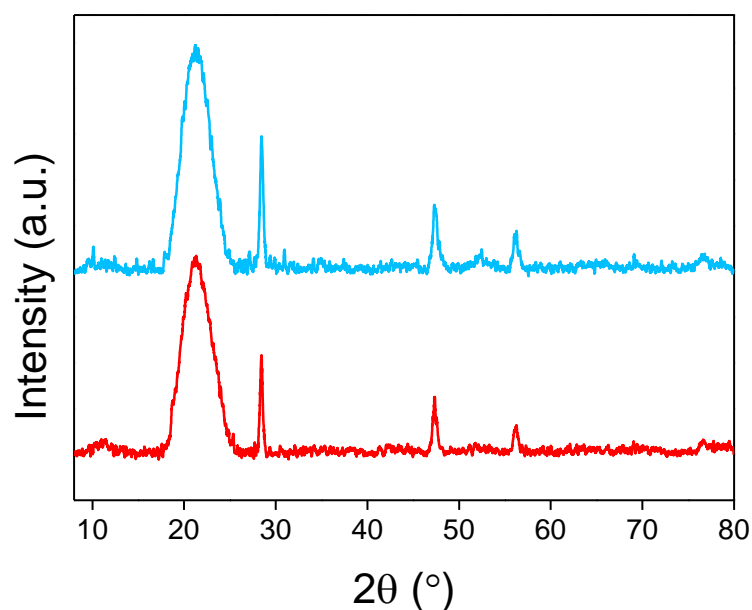

**Figure S5.** Full X-ray diffractogram of particles produced in (blue) DMF and (red) toluene.

$$L = \frac{\lambda}{\beta \cos\theta}$$

Equation S1

$$\beta_{Total} = \beta_{Instrument} + \beta_{Sample}$$

Equation S2

**Equation S1-2.** Equation S1 is the Scherrer Equation, where L is the coherent domain length, the wavelength ( $\lambda$ ) is 1.54056 Å for  $\text{CuK}\alpha_1$  radiation,  $\theta$  is the Bragg diffraction angle and  $\beta$  is the line integral breadth broadening, corrected using the Lorentzian profile approximation (Equation S2) to take into account for the instrumental broadening.

**Table S4.** Calculated coherent domain lengths based on XRD powder pattern integral breadths of the diffraction peak values using the Scherrer Equation. Average values from the 220 and 311 peak calculated in red compared to actual median particle sizes. The coherent domain length for the 111 peak was omitted in the average due to interference from the capillary.

| Solvent | Calculated Coherent Domain Length (nm) |      |      | Coherent Domain Length Avg (nm) | Actual median particle size from TEM (nm) |
|---------|----------------------------------------|------|------|---------------------------------|-------------------------------------------|
|         | 111                                    | 220  | 311  |                                 |                                           |
| DMF     | 26.5                                   | 14.1 | 17.2 | 15.6                            | 15.8 ± 5.3                                |
| Toluene | 25.6                                   | 25.0 | 18.8 | 21.9                            | 44.0 ± 14.4                               |

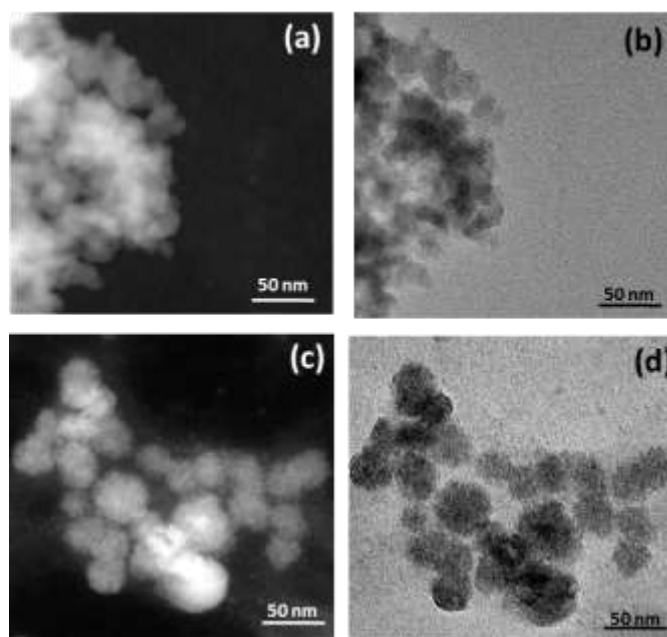

**Figure S6.** Dark field and corresponding bright field images of particles produced in (a, b) DMF and (c, d) toluene.

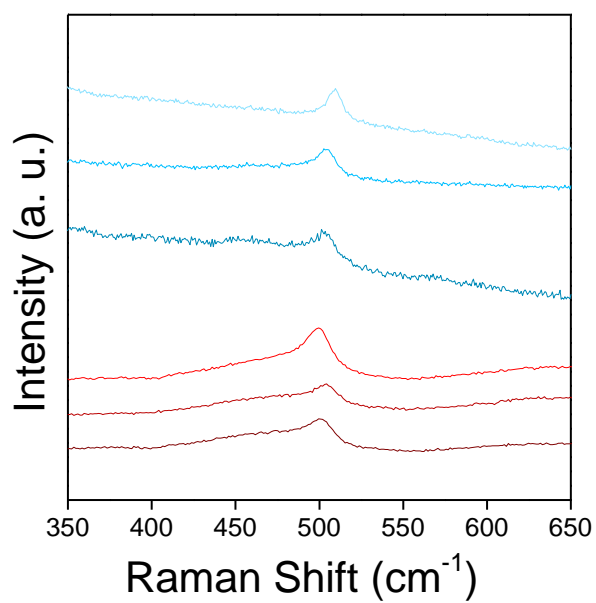

**Figure S7.** Raman spectra of three additional zones for the samples produced in DMF (blues) and toluene (reds).

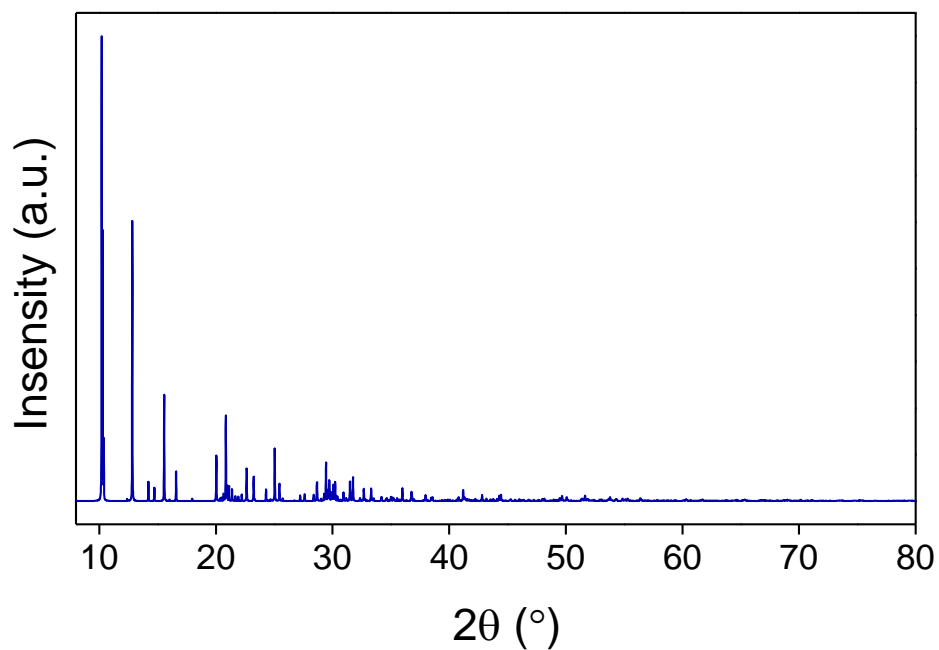

**Figure S8.** Simulated powder X-ray diffractogram of Silicon bisamidinate complex 2.

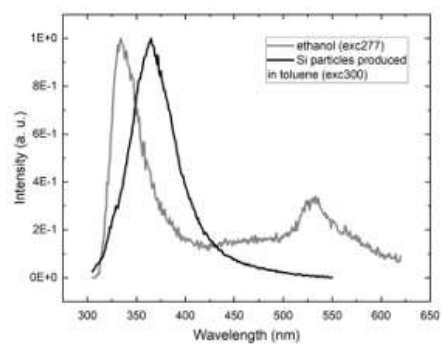

**Figure S9.** Normalized photoluminescence emission spectra of ethanol and of the silicon nanoparticles suspended in ethanol excited at 277 nm and 300 nm, respectively.

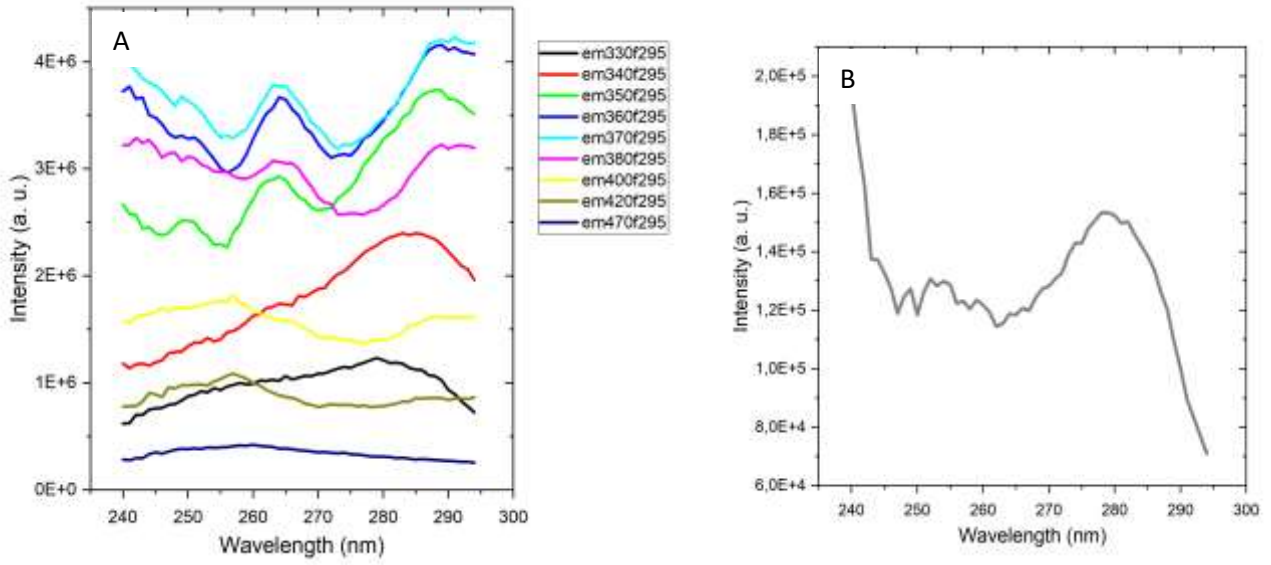

**Figure S10.** Excitation spectra of (A) silicon nanoparticles produced in toluene, recorded at various emission wavelength, and (B) ethanol, recorded at 332 nm.

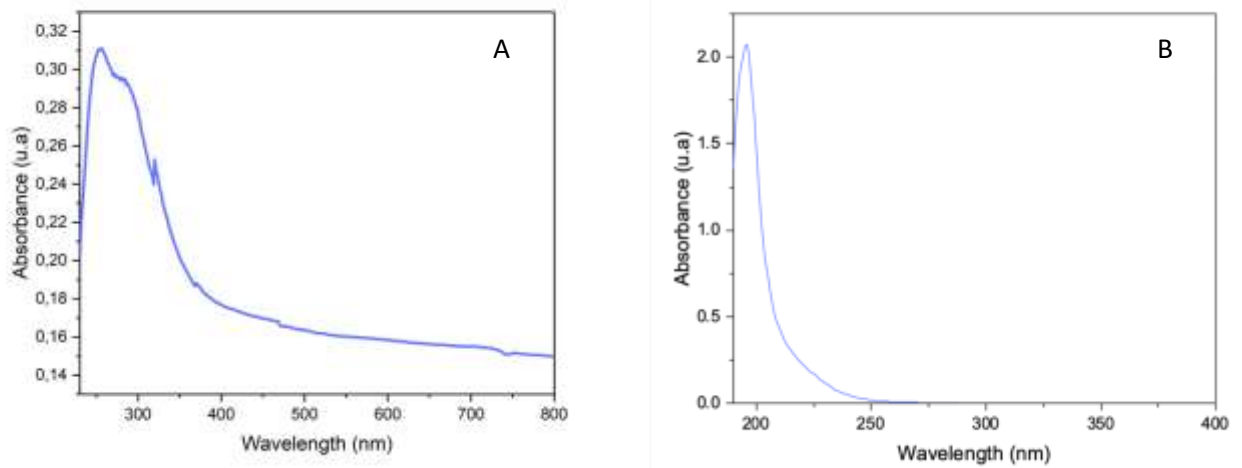

**Figure S11.** UV-vis absorption spectra of (A) the silicon nanoparticles produced in toluene, and of (B) ethanol.

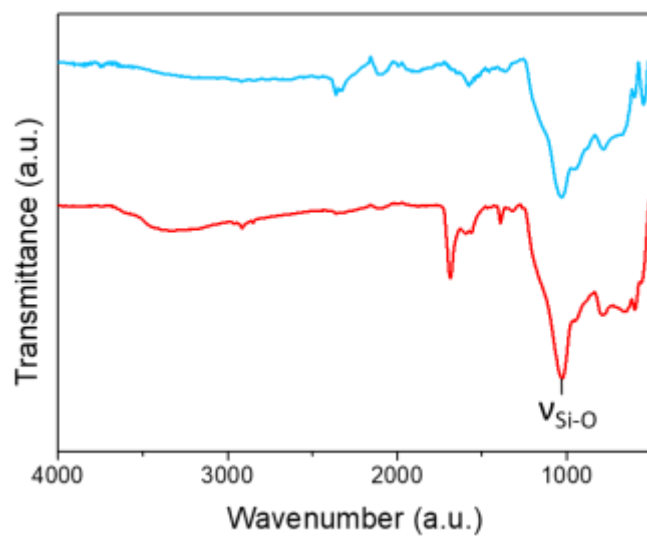

**Figure S12.** FTIR of particles produced in (blue) DMF and (red) toluene.

## References

1. R. Ketkaew, Y. Tantirungrotechai, P. Harding, G. Chastanet, P. Guionneau, M. Marchivie, and D. J. Harding, *Dalton Trans.*, 2021, **50**, 1086.
2. S. Alvarez, *Chem. Rev.*, 2015, **115**, 13447.
